# Supplementary material for: Double-negative-2 B cells are the major synovial plasma cell precursor in rheumatoid arthritis
Source: PubMed Central journal article supplement (PMC10450142; doi:10.3389/fimmu.2023.1241474), 2023-08-10
Supplement: Image_1.pdf [file Image_1.pdf]

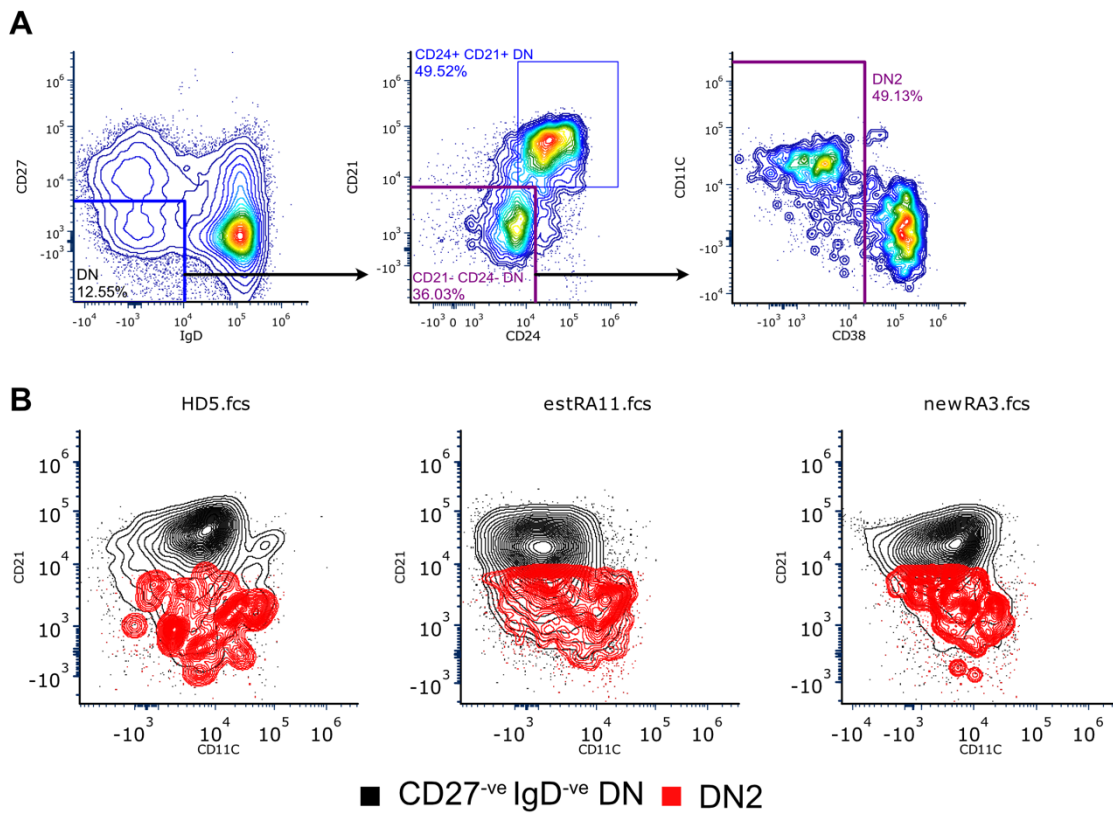

**Supplementary Figure S1: DN2 gating strategy.**

A) Flow cytometry gating strategy for DN2 B cells in Figure 1. From CD19<sup>+</sup> CD3<sup>-ve</sup> B cells the CD27<sup>-ve</sup> IgD<sup>-ve</sup> DN population was gated, from the DN population the CD21<sup>-ve</sup> CD24<sup>-ve</sup> were gated followed by the CD38<sup>-ve</sup>.

B) Representative contour plots of CD21 and CD11c expression within the DN population with colour overlay for the gated DN2 population.
