# Supplementary material for: Double-negative-2 B cells are the major synovial plasma cell precursor in rheumatoid arthritis
Source: PubMed Central journal article supplement (PMC10450142; doi:10.3389/fimmu.2023.1241474), 2023-08-10
Supplement: Image_2.pdf [file Image_2.pdf]

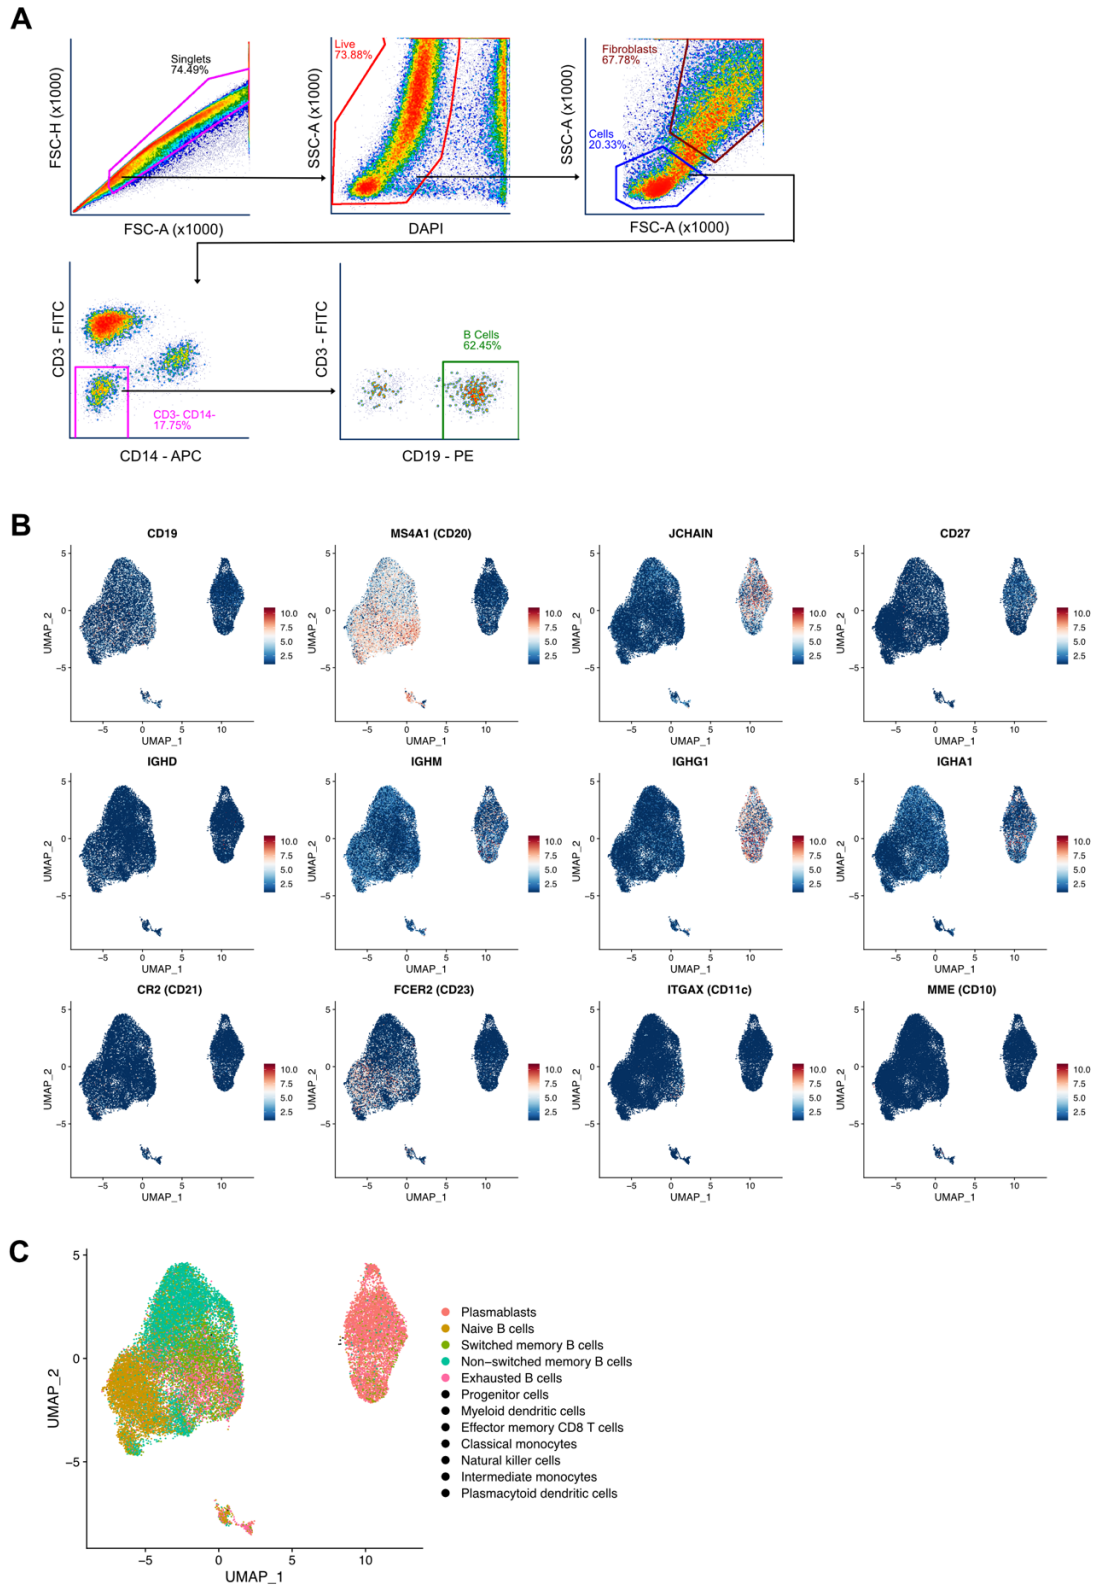

**Supplementary Figure S2: Isolation and annotation of CD19<sup>+</sup>ve synovial B cells.**

A) Flow cytometry gating strategy for FACS sorting CD19<sup>+</sup>ve B cells from human synovial tissue; representative plot from three samples.

B) Selected expression of important genes used for identifying B cell subsets.

C) Annotation from SingleR Monaco Immune Data generated from adult peripheral blood B cell signatures.
