# Supplementary material for: Double-negative-2 B cells are the major synovial plasma cell precursor in rheumatoid arthritis
Source: PubMed Central journal article supplement (PMC10450142; doi:10.3389/fimmu.2023.1241474), 2023-08-10
Supplement: Image_3.pdf [file Image_3.pdf]

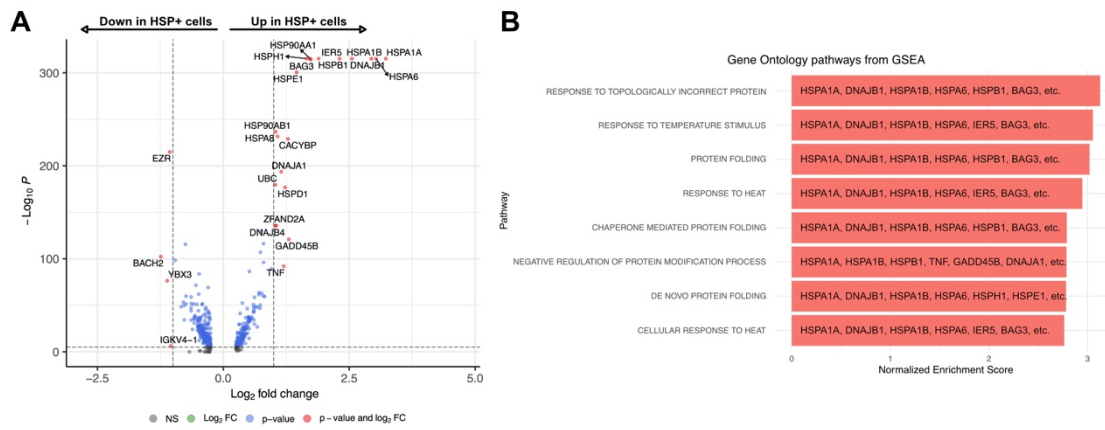

### Supplementary Figure S3: Heat shock protein cluster

- A) Differential expression analysis of HSP+ cells compared to all other non-ASCs.  
 B) Gene set enrichment analysis using GO Biological Pathways gene sets.
