# Supplementary material for: Double-negative-2 B cells are the major synovial plasma cell precursor in rheumatoid arthritis
Source: PubMed Central journal article supplement (PMC10450142; doi:10.3389/fimmu.2023.1241474), 2023-08-10
Supplement: Image_7.pdf [file Image_7.pdf]

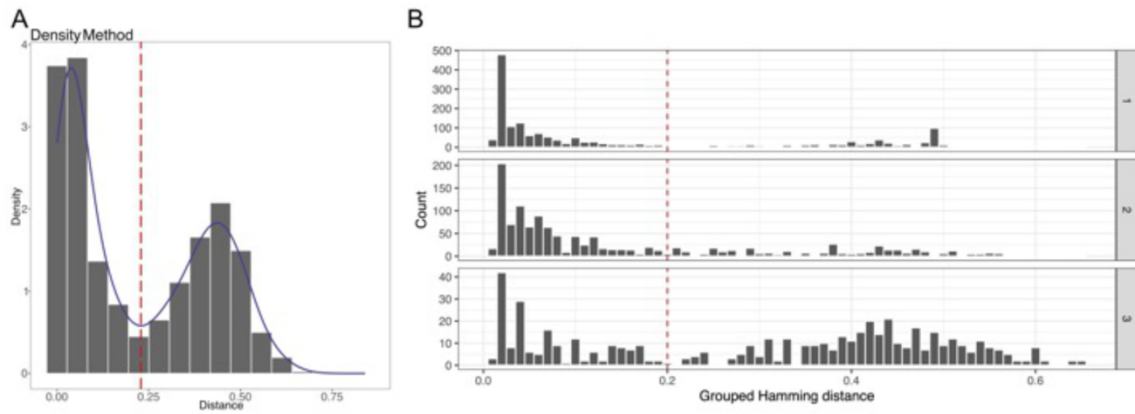

**Supplementary Figure S7: Calculating hamming distance for Change-O.**

- A) Shazam output histogram of the nearest neighbour distances followed by automated threshold detection for the threshold separating the two modes.
- B) Histogram of the nearest neighbour independently for each sample.
