# Supplementary material for: Double-negative-2 B cells are the major synovial plasma cell precursor in rheumatoid arthritis
Source: PubMed Central journal article supplement (PMC10450142; doi:10.3389/fimmu.2023.1241474), 2023-08-10
Supplement: Table_1.pdf [file Table_1.pdf]

## Supplementary Tables

**Supplementary Table 1** – Characteristics of patients used for full spectrum flow cytometry and the scRNA-seq.

|                             | RA patients for flow cytometry (n=34) | Paired synovium for flow cytometry (n=5) | Arthroplasty patients for single cell RNA-seq (n=3) |
|-----------------------------|---------------------------------------|------------------------------------------|-----------------------------------------------------|
| Age (year, IQR)             | 57.5 (50.3-65)                        | 58.9 (49.8-68.6)                         | 66.8 (66.6-68.1)                                    |
| Female (%)                  | 25 (73.5)                             | 4 (80)                                   | 3 (100)                                             |
| CCP (IU/ml, IQR)            | 164.8 (36-238) * <sup>1</sup>         | 219 (105.5-323) * <sup>4</sup>           | 473 (336.6-536.5)                                   |
| RF (IU/ml, IQR)             | 149 (27.5-223) * <sup>2</sup>         | 314.72 (200-500)                         | 326.5 (263.3-389.75) * <sup>5</sup>                 |
| Baseline DAS28 (IQR)        | 5.26 (3.36-6.93) * <sup>3</sup>       | N/A                                      | N/A                                                 |
| DMARD treatment             |                                       |                                          |                                                     |
| -Methotrexate               | 9                                     | 2                                        | 1                                                   |
| -Hydroxychloroquine         | 6                                     | 1                                        | 0                                                   |
| -Sulfasalazine              | 4                                     | 2                                        | 0                                                   |
| -Leflunomide                | 1                                     | 0                                        | 0                                                   |
| Biologic Therapies          |                                       |                                          |                                                     |
| -Adalimumab                 | 0                                     | 0                                        | 1                                                   |
| -Etanercept                 | 1                                     | 1                                        | 0                                                   |
| Number of concurrent DMARDS |                                       |                                          |                                                     |
| -One                        | 8                                     | 1                                        | 1                                                   |
| -Two                        | 2                                     | 2                                        | 0                                                   |
| -Three                      | 1                                     | 0                                        | 0                                                   |

\*<sup>1</sup> n = 25, \*<sup>2</sup> n = 26, \*<sup>3</sup> n = 28, \*<sup>4</sup> n = 3, \*<sup>5</sup> n = 2.
