# Supplementary material for: Double-negative-2 B cells are the major synovial plasma cell precursor in rheumatoid arthritis
Source: PubMed Central journal article supplement (PMC10450142; doi:10.3389/fimmu.2023.1241474), 2023-08-10
Supplement: Table_2.pdf [file Table_2.pdf]

**Supplementary Table 2** - Antibody reagents for FACS sorting.

| <u>Antibody (Clone)</u> | <u>Fluorochrome</u> | <u>Isotype</u>        | <u>Source</u> | <u>Dilution</u> |
|-------------------------|---------------------|-----------------------|---------------|-----------------|
| Anti-human CD19 (HIB19) | PE                  | Mouse IgG1, $\kappa$  | BioLegend     | 1:50            |
| Anti-human CD3 (HIT3a)  | FITC                | Mouse IgG2a, $\kappa$ | BioLegend     | 1:50            |
| Anti-human CD14 (63D3)  | APC                 | Mouse IgG1, $\kappa$  | BioLegend     | 1:50            |
| DAPI                    |                     |                       | Sigma-Aldrich | 1:10000         |
