# Supplementary material for: Double-negative-2 B cells are the major synovial plasma cell precursor in rheumatoid arthritis
Source: PubMed Central journal article supplement (PMC10450142; doi:10.3389/fimmu.2023.1241474), 2023-08-10
Supplement: Table_3.pdf [file Table_3.pdf]

**Supplementary Table 3** - Antibodies used in full spectrum flow cytometry staining.

| <u>Antibody (Clone)</u>                      | <u>Fluorochrome</u>  | <u>Isotype</u> | <u>Source</u>           | <u>Panel</u> | <u>Dilution</u> |
|----------------------------------------------|----------------------|----------------|-------------------------|--------------|-----------------|
| Anti-human CD10 (HI10a)                      | Brilliant Violet 480 | Mouse IgG1, κ  | BD Biosciences          | 1 & 2        | 1:67            |
| Anti-human CD11c (3.9)                       | Brilliant Violet 785 | Mouse IgG1, κ  | BioLegend               | 1 & 2        | 1:50            |
| Anti-human CD138 (1D4)                       | PE-Cy5               | Mouse IgG1     | Strattech               | 1            | 1:50            |
| Anti-human CD138 (MI15)                      | PE/Cy5               | Mouse IgG1, κ  | AAT Bioquest            | 2            | 1:50            |
| Anti-human CD14 (63D3)                       | BV510                | Mouse IgG2a, κ | BioLegend               | 1            | 1:50            |
| Anti-human CD184 (CXCR4) (12G5)              | PerCP-eFluor™ 710    | Mouse IgG2a, κ | ThermoFisher Scientific | 2            | 1:50            |
| Anti-human CD185 (CXCR5) (MU5UBEE)           | Super Bright 436     | Mouse IgG2b, κ | ThermoFisher Scientific | 1 & 2        | 1:50            |
| Anti-human CD19 (HIB19)                      | Brilliant Violet 711 | Mouse IgG1, κ  | BioLegend               | 2            | 1:50            |
| Anti-human CD19 (HIB19)                      | PE/Dazzle™ 594       | Mouse IgG1, κ  | BioLegend               | 1            | 1:50            |
| Anti-human CD20 (2H7)                        | eFluor 450           | Mouse IgG2b, κ | ThermoFisher Scientific | 1 & 2        | 1:50            |
| Anti-human CD21 (Bu32)                       | PE/Cyanine7          | Mouse IgG1, κ  | BioLegend               | 1 & 2        | 1:50            |
| Anti-human CD23 (M-L233)                     | Brilliant Violet 750 | Mouse IgG1, κ  | BD Biosciences          | 1 & 2        | 1:67            |
| Anti-human CD24 (ML5)                        | Brilliant Violet 650 | Mouse IgG2a, κ | BD Biosciences          | 1 & 2        | 1:50            |
| Anti-human CD27 (M-T271)                     | APC                  | Mouse IgG1, κ  | BD Biosciences          | 2            | 1:20            |
| Anti-human CD3 (UCHT1)                       | Alexa Fluor 532      | Mouse IgG1, κ  | ThermoFisher Scientific | 1 & 2        | 1:50            |
| Anti-human CD307e (FcRL5) (509f6)            | PE                   | Mouse IgG2a, κ | BioLegend               | 1 & 2        | 1:50            |
| Anti-human CD38 (HIT2)                       | Brilliant Violet 605 | Mouse IgG1, κ  | BioLegend               | 1 & 2        | 1:50            |
| Anti-human CD39 (A1)                         | PE/Fire™ 810         | Mouse IgG1, κ  | BioLegend               | 2            | 1:50            |
| Anti-human CD40 (5C3)                        | Alexa Fluor 700      | Mouse IgG1, κ  | BioLegend               | 2            | 1:50            |
| Anti-human CD45RB (MT4)                      | BV711                | Mouse IgG1, κ  | BD                      | 1            | 1:100           |
| Anti-human CD5 (L17F12)                      | PE/Dazzle™ 594       | Mouse IgG2a, κ | BioLegend               | 2            | 1:50            |
| Anti-human CD73 (Ecto-5'-nucleotidase) (AD2) | FITC                 | Mouse IgG1, κ  | BioLegend               | 1 & 2        | 1:50            |
| Anti-human CD86 (BU63)                       | Brilliant Violet 421 | Mouse IgG1, κ  | BioLegend               | 1 & 2        | 1:50            |

|                             |                      |                |                 |       |        |
|-----------------------------|----------------------|----------------|-----------------|-------|--------|
| Anti-human CD95 (Fas) (DX2) | PE/Fire™ 640         | Mouse IgG1, κ  | BioLegend       | 2     | 1:50   |
| Anti-human CD95 (Fas) (DX2) | AF700                | Mouse IgG1, κ  | BioLegend       | 1     | 1:50   |
| Anti-human HLA-DR (L243)    | APC/Fire™ 810        | Mouse IgG2a, κ | BioLegend       | 1 & 2 | 1:50   |
| Anti-human IgA (IS11-8E10)  | VioGreen             | Mouse IgG1, κ  | Miltenyi Biotec | 2     | 1:100  |
| Anti-human IgD (IA6-2)      | APC/Fire™ 750        | Mouse IgG2a, κ | BioLegend       | 2     | 1:50   |
| Anti-human IgD (IA6-2)      | APC-Cy7              | Mouse IgG2a, κ | BioLegend       | 1     | 1:50   |
| Anti-human IgG (M1310G05)   | Alexa Fluor 647      | Rat IgG2a, κ   | BioLegend       | 1 & 2 | 1:50   |
| Anti-human IgM (MHM-88)     | Brilliant Violet 570 | Mouse IgG1, κ  | BioLegend       | 2     | 1:50   |
| Anti-human IgM (SA-DA4)     | PerCP-eF710          | Mouse IgG1, κ  | ThermoFisher    | 1     | 1:50   |
| Fixable Viability Kit       | Zombie NIR™          |                | BioLegend       | 1 & 2 | 1:1000 |
