# Supplementary material for: Double-negative-2 B cells are the major synovial plasma cell precursor in rheumatoid arthritis
Source: PubMed Central journal article supplement (PMC10450142; doi:10.3389/fimmu.2023.1241474), 2023-08-10
Supplement: Table_4.pdf [file Table_4.pdf]

**Supplementary Table 4** - Subset proportions for all known B cell subsets in the blood. Mann-Whitney test for non-normally distributed, unpaired data. t test for normally distributed, unpaired data.

| B Cell Population  |                            | Markers                                                                                                                         | Healthy (%<br>IQR)<br>n=15 | RA (%<br>IQR)<br>n=29 | P value       |
|--------------------|----------------------------|---------------------------------------------------------------------------------------------------------------------------------|----------------------------|-----------------------|---------------|
| Naive              |                            | IgD <sup>+ve</sup> CD27 <sup>-ve</sup>                                                                                          | 70.3 (14.4)                | 72.3 (8.2)            | 0.5837        |
| Unswitched Memory  |                            | IgD <sup>+ve</sup> CD27 <sup>+ve</sup>                                                                                          | 12.3 (8.83)                | 10.3 (5.54)           | 0.4188        |
| Switched Memory    |                            | IgD <sup>-ve</sup> CD27 <sup>+ve</sup>                                                                                          | 13.4 (6.9)                 | 13.2 (6.9)            | 0.9233        |
| Double Negative    |                            | IgD <sup>-ve</sup> CD27 <sup>-ve</sup>                                                                                          | 11.4 (5.25)                | 13.5 (5.0)            | 0.2721        |
| <hr/>              |                            |                                                                                                                                 |                            |                       |               |
| Transitional       | T1                         | IgD <sup>+ve</sup> CD27 <sup>-ve</sup> CD38 <sup>high</sup><br>CD24 <sup>high</sup>                                             | 3.68 (2.04)                | 3.58 (1.9)            | 0.8871        |
|                    | T2-MZP                     | IgD <sup>+ve</sup> CD27 <sup>-ve</sup> CD38 <sup>high</sup><br>CD24 <sup>high</sup> CD21 <sup>high</sup>                        | 0.227 (0.27)               | 0.226<br>(0.27)       | 0.3934        |
|                    | T3                         | IgD <sup>+ve</sup> CD27 <sup>-ve</sup> CD38 <sup>+ve</sup><br>CD24 <sup>+ve</sup> CD21 <sup>+ve</sup>                           | 1.75 (1.95)                | 1.67 (1.35)           | 0.6727        |
| <hr/>              |                            |                                                                                                                                 |                            |                       |               |
| Naive              | Resting                    | CD38 <sup>+ve</sup> CD24 <sup>+ve</sup> CD21 <sup>+ve</sup>                                                                     | 48.6 (13.5)                | 47.1 (13.1)           | 0.7772        |
|                    | Activated                  | CD38 <sup>-ve</sup> CD24 <sup>-ve</sup> CD21 <sup>-ve</sup>                                                                     | 1.13 (0.889)               | 2.35 (1.52)           | <b>0.0091</b> |
|                    | Anergic                    | CD38 <sup>+ve/low</sup> CD24 <sup>+ve</sup><br>CD21 <sup>-ve</sup>                                                              | 6.61 (4.0)                 | 5.79 (2.2)            | 0.6773        |
| <hr/>              |                            |                                                                                                                                 |                            |                       |               |
| Memory             | Unswitched                 | CD38 <sup>+ve/low</sup> CD24 <sup>+ve</sup><br>CD21 <sup>+ve</sup>                                                              | 10.1 (8.2)                 | 8.09 (4.6)            | 0.3139        |
|                    | IgM <sup>+ve</sup> Only    | IgD <sup>-ve</sup> IgM <sup>+ve</sup> CD27 <sup>+ve</sup><br>CD38 <sup>+ve/low</sup> CD24 <sup>+ve</sup><br>CD21 <sup>+ve</sup> | 2.86 (2.1)                 | 1.32<br>(0.718)       | <b>0.0008</b> |
|                    | Switched                   | CD38 <sup>+ve/low</sup> CD24 <sup>+ve</sup><br>CD21 <sup>+ve</sup>                                                              | 6.92 (4.92)                | 5.36 (3.5)            | 0.2855        |
|                    | Resting<br>Switched Active | CD38 <sup>-ve</sup> CD24 <sup>-ve</sup> CD21 <sup>-ve</sup>                                                                     | 0.607 (0.50)               | 1.24 (1.07)           | 0.0943        |
| <hr/>              |                            |                                                                                                                                 |                            |                       |               |
| Double<br>Negative | DN1                        | CD38 <sup>+ve</sup> CD24 <sup>+ve</sup> CD21 <sup>+ve</sup>                                                                     | 7.28 (3.9)                 | 6.78 (3.94)           | 0.3479        |
|                    | DN2                        | CD38 <sup>-ve</sup> CD24 <sup>-ve</sup> CD21 <sup>-ve</sup>                                                                     | 0.757 (0.77)               | 1.51 (0.59)           | <b>0.0003</b> |
| <hr/>              |                            |                                                                                                                                 |                            |                       |               |
| ASC                |                            | CD27 <sup>high</sup> CD20 <sup>-ve</sup>                                                                                        | 1.33 (0.92)                | 2.43 (2.0)            | 0.5278        |
| <hr/>              |                            |                                                                                                                                 |                            |                       |               |
| B1                 |                            | IgD <sup>high</sup> CD27 <sup>+ve</sup>                                                                                         | 0.691 (0.92)               | 0.933<br>(0.81)       | 0.6027        |
